# Supplementary material
Source: PubMed Central journal article supplement (PMC2268247)

**IDENTIFICATION OF NOVEL TOXICITY-ASSOCIATED METABOLITES BY  
METABOLOMICS AND MASS ISOTOPOMER ANALYSIS OF ACETAMINOPHEN  
METABOLISM IN WILD-TYPE AND CYP2E1-NULL MICE**

**Chi Chen<sup>1</sup>, Kristopher W. Krausz<sup>1</sup>, Jeffrey R. Idle<sup>2</sup>, Frank J. Gonzalez<sup>1</sup>**

Laboratory of Metabolism, Center for Cancer Research, National Cancer Institute, National  
Institutes of Health, Bethesda, MD<sup>1</sup>; Institute of Pharmacology, 1<sup>st</sup> Faculty of Medicine, Charles  
University, Prague, Czech Republic<sup>2</sup>

**Supplemental Tables and Figures**

**Supplemental Table 1.** Comparison of major APAP metabolites in the serum of wild-type (*Cyp2e1*<sup>+/+</sup>) and *Cyp2e1*-null (*Cyp2e1*<sup>-/-</sup>) mice. Data were processed by MarkerLynx software. Relative abundances of APAP and its metabolites (mean  $\pm$  SD in parts per ten thousand) were determined by normalizing the single ion counts (SIC) of each metabolite *versus* the total ion counts (TIC) of each serum sample (n=4, \* for  $P < 0.05$ , \*\* for  $P < 0.01$ , ND for not detected).

| Metabolites    | 1 h                          |                              | 2 h                          |                              | 4 h                          |                              |
|----------------|------------------------------|------------------------------|------------------------------|------------------------------|------------------------------|------------------------------|
|                | <i>Cyp2e1</i> <sup>+/+</sup> | <i>Cyp2e1</i> <sup>-/-</sup> | <i>Cyp2e1</i> <sup>+/+</sup> | <i>Cyp2e1</i> <sup>-/-</sup> | <i>Cyp2e1</i> <sup>+/+</sup> | <i>Cyp2e1</i> <sup>-/-</sup> |
| APAP (I)       | 224.12 $\pm$ 44.11           | 228.54 $\pm$ 8.12            | 114.00 $\pm$ 5.19            | 111.37 $\pm$ 7.43            | 22.51 $\pm$ 8.62**           | 1.75 $\pm$ 3.14**            |
| Cys-APAP (II)  | 6.83 $\pm$ 2.19              | 7.19 $\pm$ 1.32              | 8.09 $\pm$ 0.58*             | 5.26 $\pm$ 1.65*             | 2.82 $\pm$ 1.21*             | 0.55 $\pm$ 0.89*             |
| NAC-APAP (III) | 15.42 $\pm$ 3.97             | 14.93 $\pm$ 3.26             | 8.17 $\pm$ 0.77              | 10.24 $\pm$ 2.47             | 2.66 $\pm$ 1.89              | 1.62 $\pm$ 1.50              |
| APAP-G (IV)    | 10.81 $\pm$ 1.56             | 11.55 $\pm$ 2.15             | 7.47 $\pm$ 0.36              | 8.23 $\pm$ 0.93              | 0.97 $\pm$ 0.66              | 0.18 $\pm$ 0.35              |
| APAP-S (V)     | 5.91 $\pm$ 1.29              | 6.48 $\pm$ 0.59              | 4.59 $\pm$ 0.93*             | 6.81 $\pm$ 1.11*             | 2.72 $\pm$ 0.96**            | ND                           |
| GS-APAP        | 12.57 $\pm$ 2.11             | 13.46 $\pm$ 9.56             | 44.37 $\pm$ 5.58*            | 21.11 $\pm$ 15.50*           | 12.50 $\pm$ 5.76**           | ND                           |

## SUPPLEMENTAL FIGURE LEGENDS

**Supplemental Figure 1.** Influence of APAP treatment on the GSSG level in liver and GSH level in mitochondria of wild-type and *Cyp2e1*-null mice. Liver samples collected at 0, 1, 2, 4, 24 h after i.p. administration of 400 mg/kg APAP were processed as described in the *Experimental procedures* (n=4, \* for  $P < 0.05$  and \*\* for  $P < 0.01$ ). Both oxidized and reduced glutathione levels were determined by LC-MS analysis, and normalized by liver weight. **A.** GSSG level in the liver of wild-type and *Cyp2e1*-null mice. **B.** Relative GSH level in the liver mitochondria of wild-type and *Cyp2e1*-null mice. Determined mitochondrial GSH level in control wild-type mice was arbitrarily set as 100%.

**Supplemental Figure 2.** 3-D scores plot of a PCA model on 24-h urine samples from control and APAP-treated wild-type and *Cyp2e1*-null mice. A three-component PCA model was constructed to characterize the relationship among 6 mouse groups (8 mice/group), including wild-type mice (control, 200 mg/kg APAP, 400 mg/kg APAP) and *Cyp2e1*-null mice (control, 200 mg/kg APAP, 400 mg/kg APAP). The t[1], t[2] and t[3] values represent the scores of each sample in principal component 1, 2 and 3, respectively.

**Supplemental Figure 3.** **A.** MS<sup>2</sup> fragmentation of APAP (**I**). **B.** MS<sup>2</sup> fragmentation of Cys-APAP (**II**). **C.** MS<sup>2</sup> fragmentation of NAC-APAP (**III**). **D.** MS<sup>2</sup> fragmentation of APAP-G (**IV**). Major fragment ions were interpreted in the inlaid structural diagrams.

**Supplemental Figure 4.** MS<sup>2</sup> fragmentation of *N*-acetylamino-1,4-benzothiazine formed by HRP-catalyzed reaction between Cys-APAP and H<sub>2</sub>O<sub>2</sub>.

Supplemental Figure 1

**A**

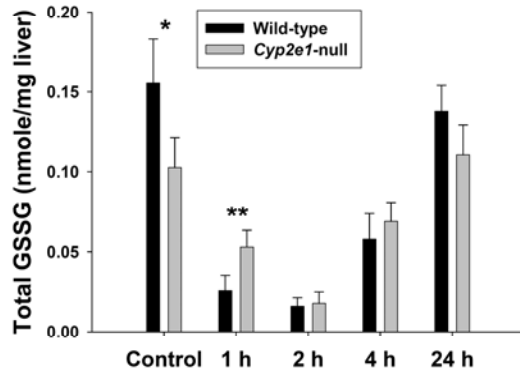

**B**

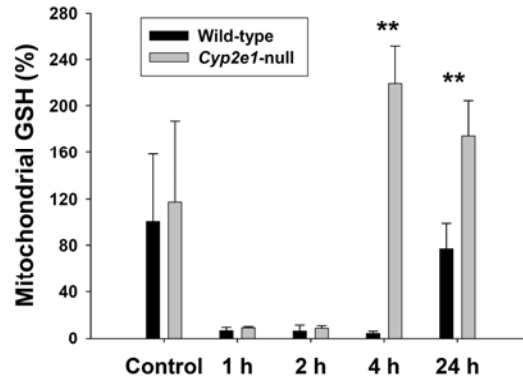

Supplemental Figure 2

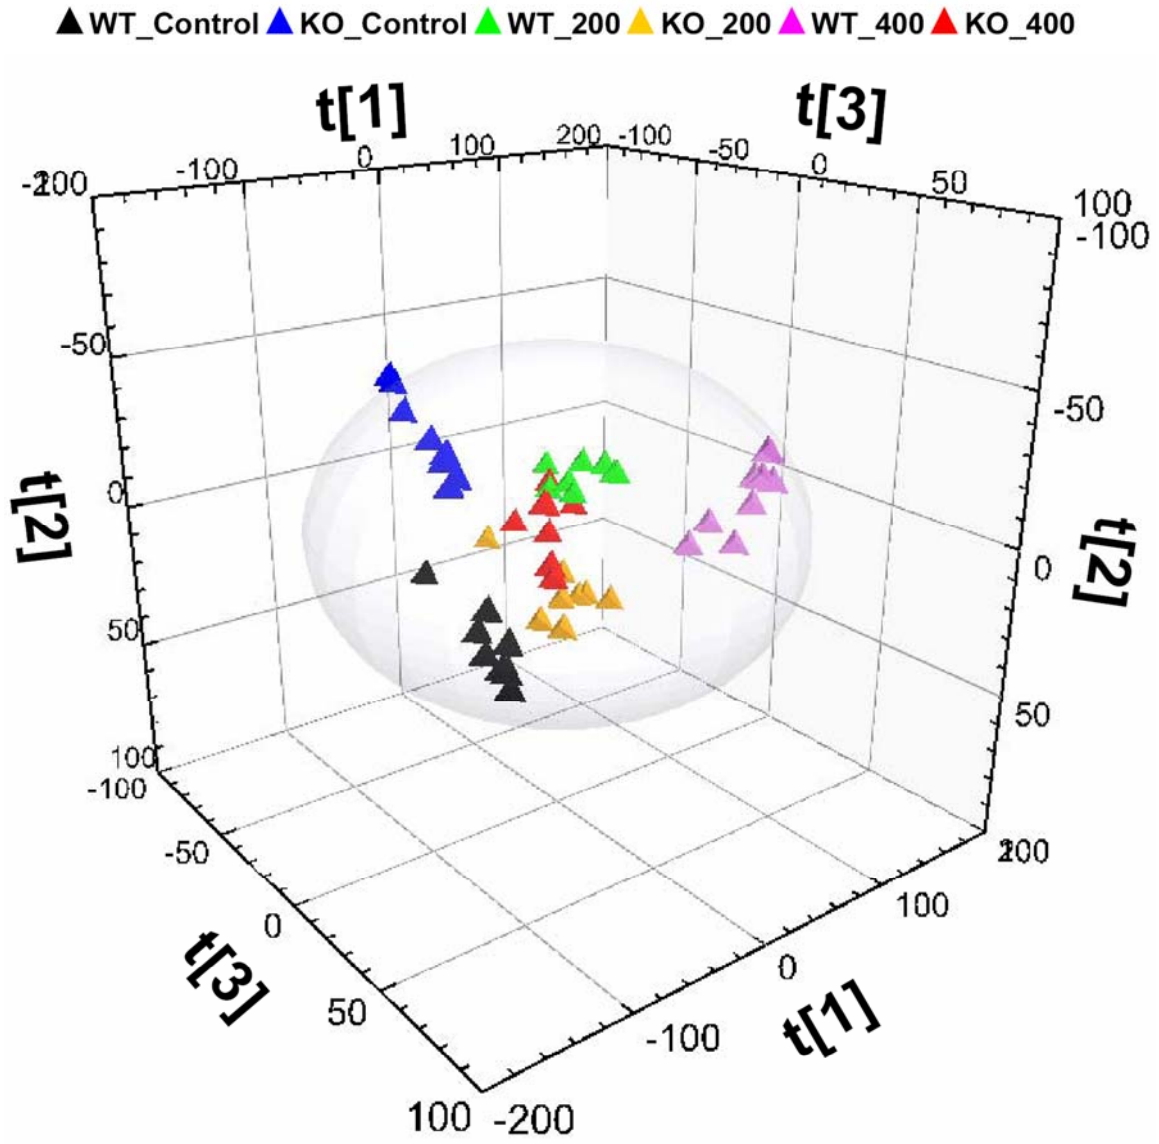

Supplemental Figure 3

**A**

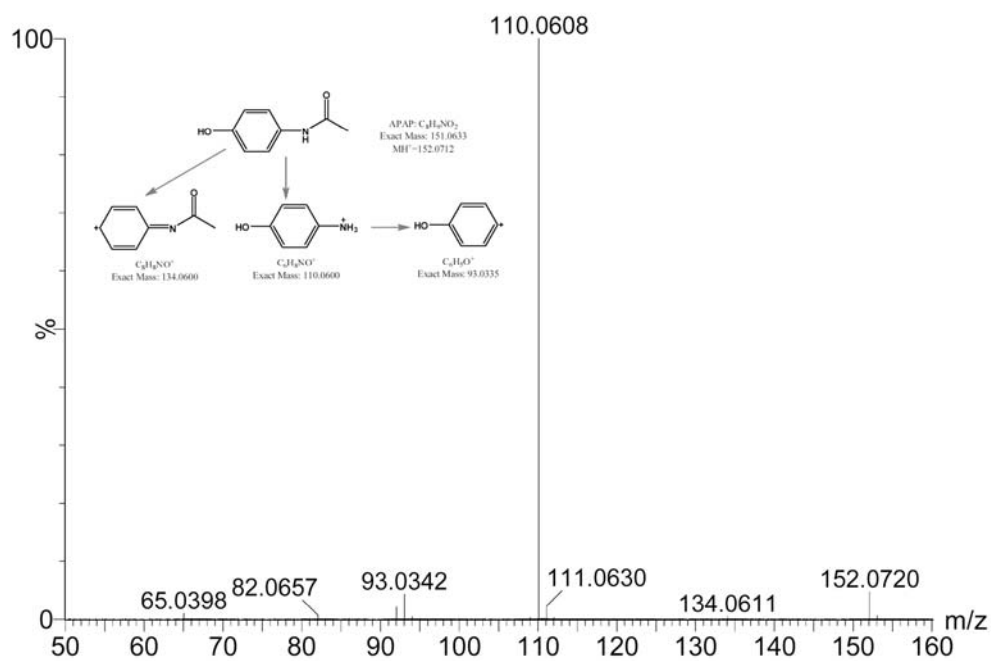

**B**

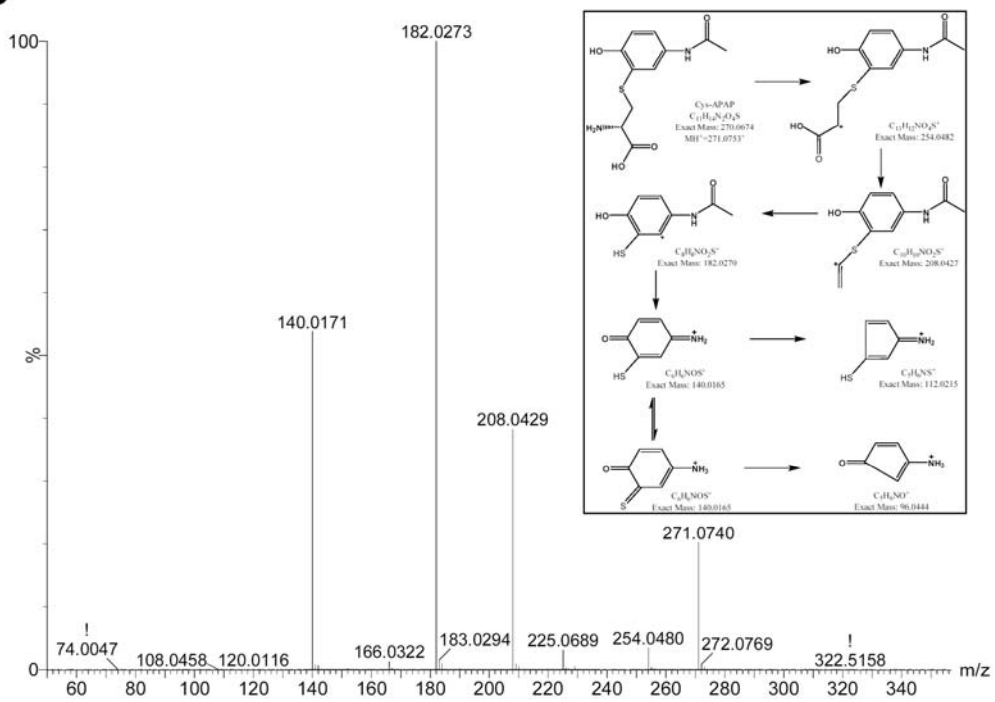

**C**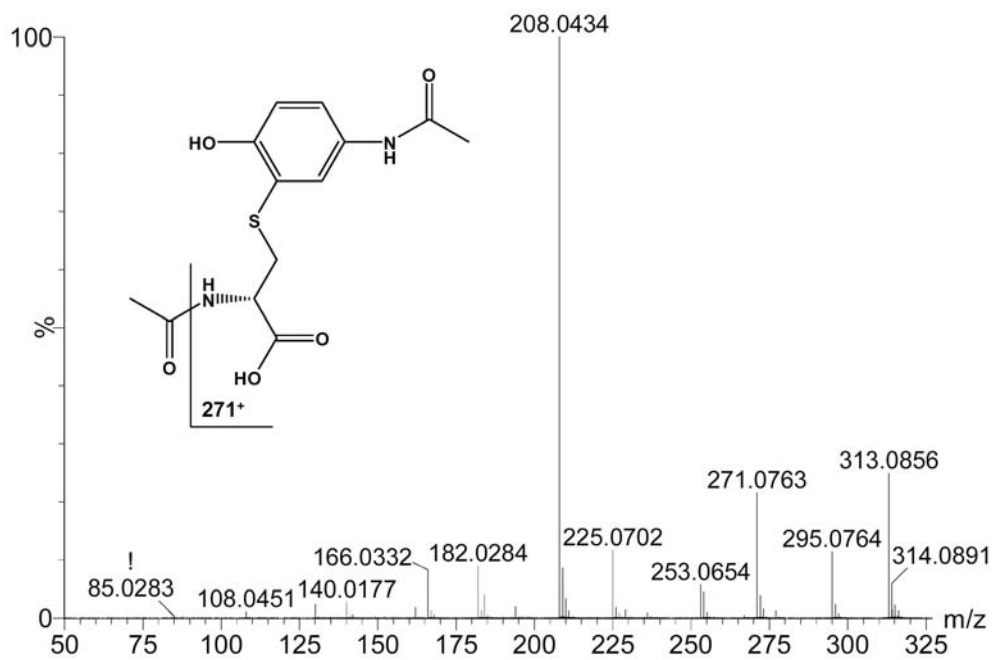**D**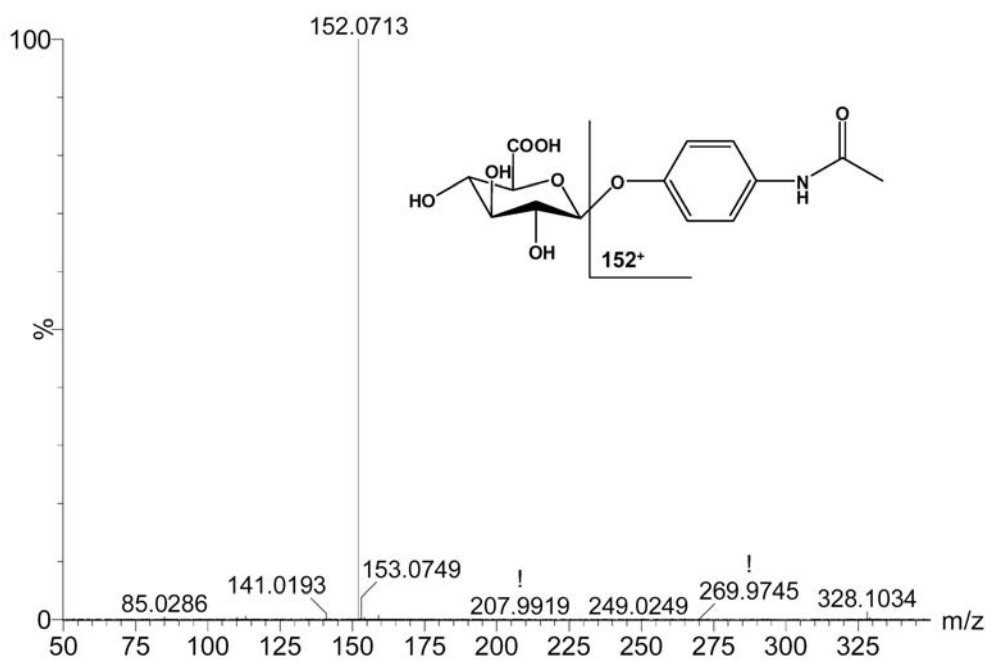

Supplemental Figure 4

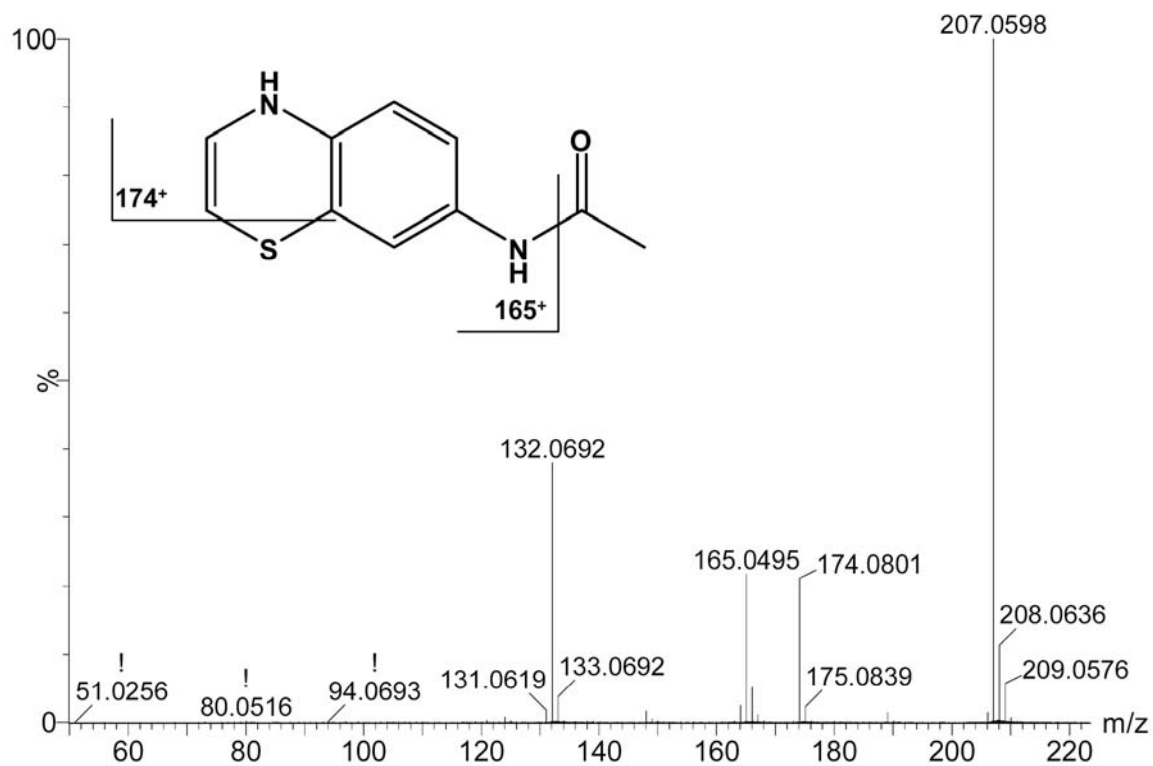

Supplement: NIHMS39860-supplement-supplement.pdf [file NIHMS39860-supplement-supplement.pdf]
